# Supplementary material for: Distinctive behaviour of live biopsy-derived carcinoma cells unveiled using coherence-controlled holographic microscopy
Source: PLoS One. 2017 Aug 28;12(8):e0183399. doi: 10.1371/journal.pone.0183399 (PMC5573213; doi:10.1371/journal.pone.0183399)
Supplement: S2 Table — Coordinates (x,y) in μm of cell center of mass taken at 5 minute interval. (XLSX) [file pone.0183399.s002.xlsx]

## Sheet: List1
X1	Y1	X2	Y2	X3	Y3	X4	Y4	X5	Y5	X6	Y6	X7	Y7	X8	Y8	X9	Y9	X10	Y10	X11	Y11	X12	Y12	X13	Y13	X14	Y14	X15	Y15	X16	Y16	X17	Y17	X18	Y18	X19	Y19	X20	Y20	X21	Y21	X22	Y22	X23	Y23	X24	Y24	X25	Y25
0.000000	0.000000	0.000000	0.000000	0.000000	0.000000	0.000000	0.000000	0.000000	0.000000	0.000000	0.000000	0.000000	0.000000	0.000000	0.000000	0.000000	0.000000	0.000000	0.000000	0.000000	0.000000	0.000000	0.000000	0.000000	0.000000	0.000000	0.000000	0.000000	0.000000	0.000000	0.000000	0.000000	0.000000	0.000000	0.000000	0.000000	0.000000	0.000000	0.000000	0.000000	0.000000	0.000000	0.000000	0.000000	0.000000	0.000000	0.000000	0.000000	0.000000
-4.447824	7.631632	-2.236202	13.789820	-4.601132	-13.584858	3.185899	7.575289	3.096448	-2.175953	-3.380621	3.401449	4.629975	4.003181	5.038476	7.633942	5.998194	-2.998613	3.573123	3.178256	-1.050600	5.480898	0.425023	4.835575	5.222449	2.260337	8.970152	-1.151791	2.590758	10.798257	1.025220	-20.717558	-0.095096	2.509794	-4.416698	3.827536	3.824305	-2.209792	-9.825267	-4.694645	-0.216435	0.764885	-2.850172	4.981507	2.712609	4.597343	-2.525488	2.359025	1.795128	-20.353712
-11.262789	12.564405	-8.612498	15.732882	-9.538503	-21.822667	6.975734	10.234902	6.443286	-4.420705	-5.964186	7.117279	11.426053	1.998340	14.336800	16.117207	8.654509	-5.465801	13.433456	5.252775	1.365520	9.300312	-0.055465	9.099912	8.569897	6.376574	16.863474	-0.393876	-2.968527	15.934479	-10.991975	-34.106664	-2.839324	6.374607	-9.277434	5.316168	9.191569	-5.548974	-17.530798	-0.629990	-0.397025	-6.868296	-8.996814	9.556914	7.881335	7.061384	-1.271921	9.220577	-4.136368	-10.505057
-18.879277	9.591539	-2.474868	6.405399	-14.287573	-27.004574	12.721301	14.438118	8.247270	-10.741791	-11.383406	8.634239	19.941255	3.276479	29.592333	20.500026	13.411609	-9.311708	10.069652	9.098833	3.695278	13.657044	-1.252280	15.425628	13.071038	8.311647	23.456969	0.226386	-8.376113	27.425537	-23.542514	-46.043181	-4.653495	10.622976	-13.514596	7.909591	8.823451	-13.475476	-26.094269	10.126326	-7.920655	-10.643806	-10.602706	18.864864	13.529335	6.892430	1.020240	15.300690	-1.451475	-16.526672
-27.839610	8.804608	17.939273	9.858124	-12.734207	-23.688449	14.506524	26.658849	13.489561	-16.839554	-18.470725	11.079483	26.664329	1.405023	37.004778	11.258432	14.932511	-15.584085	11.925080	10.566254	3.907321	18.746500	-0.488434	15.394517	13.247658	16.005966	29.443493	-0.031314	-4.964819	36.869983	-38.151735	-48.009964	-9.584104	17.761475	-15.311746	8.532313	3.350979	-21.746026	-34.473595	11.217301	-12.352972	-14.651138	-8.596418	25.376726	16.824249	5.329627	-1.522072	21.288955	2.664357	-20.463179
-35.932746	-0.632300	20.970253	15.787640	-4.029873	-24.332954	9.620824	36.627523	21.550650	-17.144267	-23.154475	18.605609	33.554422	3.711917	46.871292	-0.546487	16.493811	-25.033723	20.234374	10.549887	4.705362	22.716685	-4.250240	20.084691	23.767724	13.966977	34.896101	0.458868	5.736498	41.178085	-50.447637	-46.280771	-12.029347	23.199874	-16.759584	11.513490	-3.649863	-27.593796	-34.169693	3.806289	-15.385704	-17.723877	-12.691217	29.346067	23.335756	8.136523	-4.556325	28.999623	2.769403	-27.895791
-29.430893	-8.915266	13.933706	18.703266	4.916237	-25.181860	-2.027568	40.695261	24.697186	-19.332873	-22.023614	27.077247	40.387246	4.361601	53.666218	-8.429999	19.008999	-35.246482	24.142552	14.310238	5.416945	26.658762	-2.991048	20.559651	29.328062	13.764712	36.640363	-0.020900	10.227439	41.148410	-53.031399	-43.059841	-15.364190	26.134169	-19.292927	18.924640	-6.048154	-30.867330	-31.594326	-3.273173	-19.294271	-11.606501	-11.350696	35.309024	28.882041	7.799495	-4.058318	34.914784	-0.378446	-37.499891
-28.806630	-19.006729	11.487405	23.175072	11.944406	-30.449450	-11.527499	36.905206	25.288640	-27.981342	-24.008644	33.942064	50.398684	4.250517	54.952172	-14.636033	18.872201	-44.633932	29.208111	18.594006	6.917095	31.411138	-4.562532	20.891998	35.765731	20.948485	38.446989	-2.432377	12.252548	49.174054	-53.458572	-36.598787	-21.822227	29.194242	-28.081392	25.925799	-9.848231	-38.925237	-32.829460	-0.179769	-23.300291	-5.439302	-10.657080	38.524036	32.748018	6.461514	-4.167214	42.700205	-0.526404	-50.113045
-33.998018	-24.758996	20.456850	25.396587	14.981203	-36.519813	-12.635120	44.890621	22.174387	-39.894616	-29.099734	40.770366	54.817416	7.483560	59.030303	-20.725518	16.643670	-54.228424	33.165499	22.996648	6.229349	35.550361	-5.224858	24.302265	39.701141	27.240941	39.510752	-1.665646	15.750618	59.270916	-55.226116	-36.198724	-24.589385	34.150788	-37.753167	33.314617	-9.305518	-48.185475	-31.034831	-1.310042	-14.166140	-3.703196	-11.440841	38.462887	36.470016	6.384097	-7.151193	47.411759	-8.571976	-61.025245
-33.459053	-31.266217	26.280244	26.553435	14.366896	-45.429223	-12.410874	54.664266	19.406821	-48.740445	-35.339290	47.652696	59.827867	8.094705	60.345698	-29.180713	18.042767	-64.539965	36.141160	27.633287	6.411467	39.164145	-5.432005	23.948020	37.512314	6.870752	42.172650	1.269838	18.437369	73.313169	-59.854476	-38.769753	-27.695696	37.862524	-49.426973	36.397070	-10.293094	-60.392607	-28.857543	-7.863854	-14.210109	-1.513995	-9.589895	45.705352	40.989729	2.871113	-10.826198	48.352353	-19.996556	-68.451580
-31.902374	-40.212051	27.057583	29.602978	10.753902	-53.162988	-22.381246	55.766523	22.492098	-54.968145	-40.680998	57.909368	64.518161	4.295770	61.606280	-38.631848	22.777071	-72.633653	39.121951	31.721320	7.654770	42.033650	-5.352045	22.772174	41.703801	11.858572	45.302177	1.006443	24.970769	79.404796	-66.560107	-45.305967	-28.548829	41.850950	-64.779396	42.807863	-6.464391	-69.550374	-33.043546	-9.078607	-12.893174	6.019854	-14.603839	50.228934	46.929957	-2.252030	-10.790169	52.474854	-23.466060	-69.731950
-28.371526	-48.504463	23.384551	31.427190	8.128445	-55.163658	-31.075517	50.698335	32.541038	-52.787992	-46.711663	65.532750	68.100657	4.599370	62.682105	-47.490199	26.980897	-79.163105	42.003886	34.326135	7.450693	45.101080	-5.009518	23.225739	45.476563	21.154034	50.477515	-2.391058	10.509333	85.714415	-72.140449	-52.868719	-26.706100	45.935133	-76.460186	50.631036	-7.573554	-76.207656	-42.307897	-9.399909	-7.601393	12.988544	-19.338278	58.304534	52.265205	-7.163350	-8.800471	56.525128	-21.167229	-80.436363
-23.969392	-55.779237	19.589473	30.077816	10.153926	-56.146208	-31.928405	42.930002	41.131290	-44.486496	-48.538042	72.795710	75.835077	3.194965	64.140865	-58.461078	35.020144	-83.675816	45.550048	37.154391	6.576598	45.650593	-5.222725	23.534713	49.701082	26.816021	60.279894	-4.553746	-0.311196	95.725237	-79.433492	-57.856913	-29.717967	54.441492	-82.802889	59.594841	-2.731013	-81.653505	-53.827893	-7.449301	-1.338351	12.625550	-21.030704	61.889491	60.002803	-8.021014	-5.426859	58.937825	-17.917916	-77.847295
-26.038045	-66.666310	17.628042	37.787856	20.661253	-60.717275	-38.117679	48.624382	42.143309	-40.794931	-48.301546	81.660540	79.117678	6.778349	69.255020	-68.448393	41.526738	-91.843329	49.709997	39.458955	6.120196	46.839544	-4.405174	21.908016	58.821523	35.536409	68.164234	-5.207687	2.163928	104.520722	-85.187264	-63.132926	-37.109772	59.988380	-87.340725	70.740137	-2.051368	-86.142057	-70.166899	-3.012647	5.183340	9.224824	-27.272198	67.349886	65.558610	-4.452338	-3.578964	62.970016	-7.631772	-73.929265
-27.625547	-71.753759	14.650518	46.212075	29.538983	-59.479165	-39.515388	56.528096	47.911988	-44.579327	-47.750541	89.123883	81.881496	6.843689	72.971063	-85.487753	50.192968	-96.027940	56.951159	40.509378	6.435195	48.198300	-4.374263	23.479479	62.956272	37.281121	72.381819	-5.095332	8.364160	106.726854	-89.742902	-70.019780	-32.652159	70.380078	-90.625542	82.936328	-2.678703	-93.770649	-85.631673	-0.061657	12.866121	5.381009	-33.844339	71.125464	73.500967	-3.239243	-3.619589	64.679871	8.209868	-80.890219
-29.768934	-81.736461	4.424724	54.388701	38.158650	-61.036737	-47.576366	59.789673	60.044371	-48.815138	-43.160639	90.600692	86.547328	4.799982	75.023164	-96.008346	59.859655	-96.855390	60.129965	43.976030	4.188968	50.643220	-5.277531	33.638024	67.626544	39.669196	78.543150	-8.028723	8.607447	110.551371	-85.021242	-77.293587	-36.418826	69.133698	-89.449083	94.337248	-4.223446	-100.749089	-88.599261	9.007018	18.592395	4.263405	-39.258060	73.589920	78.827623	-2.820671	-0.312793	67.521362	16.727844	-85.105070
-26.014831	-86.483243	-1.448071	51.455004	42.786128	-66.367495	-53.954625	60.143933	65.940124	-47.978479	-33.113204	91.752788	97.876856	5.475618	81.944349	-101.482861	68.553720	-102.717591	64.654428	49.381714	2.440858	53.214149	0.212241	43.798168	73.503339	45.255215	82.202511	-8.224667	5.439951	117.314515	-83.789870	-79.244749	-32.844693	72.389925	-90.133933	109.414129	-8.833921	-104.352340	-85.120329	8.925011	19.458578	8.430347	-43.999434	79.935978	82.352537	-1.296914	0.337496	71.020484	18.330611	-99.330308
-20.468907	-95.749127	-15.206867	51.560258	49.210083	-76.155968	-58.013995	60.592586	66.535799	-42.869527	-24.817080	89.441694	100.660302	4.192941	89.624486	-108.494353	75.845198	-108.371515	68.499387	51.441828	-1.165207	56.367145	5.278252	50.532995	76.653702	49.324989	83.881792	-8.217457	10.659832	130.247711	-83.711139	-75.288261	-33.895935	84.676446	-91.673320	118.393507	-14.052522	-108.984542	-87.179907	6.371038	20.914617	15.102116	-46.500223	83.844658	87.595333	0.387505	1.944256	73.293237	15.491862	-107.919547
-17.394649	-98.764837	-29.052223	55.907004	50.623669	-86.571770	-65.607326	63.385616	69.770327	-40.433571	-22.133824	89.425511	105.058616	-0.415907	93.640439	-118.122624	81.437518	-116.311953	71.870479	55.675155	-6.452715	58.014651	8.399743	56.027491	81.264145	55.199630	90.333899	-6.219570	19.742666	126.846974	-92.314696	-69.687257	-36.913779	86.434472	-94.602166	128.747652	-22.538554	-112.279724	-90.030333	4.557963	26.573485	21.584354	-47.082365	84.486603	89.458576	-0.578432	-3.002027	81.146407	11.625921	-106.973809
-14.819867	-107.204948	-41.315423	46.977919	51.530955	-94.899108	-63.399737	69.816643	78.683797	-37.153400	-10.082140	90.183436	115.133388	0.644856	98.520047	-126.767100	86.528139	-124.109589	75.623739	59.996198	-11.596448	63.041286	15.033809	65.647046	84.821570	62.010976	98.822171	-4.996871	23.341068	124.588421	-105.385364	-65.893071	-42.771726	85.155687	-99.417182	140.434349	-34.503435	-114.334511	-89.374981	12.389866	28.164518	31.554418	-51.812315	80.461431	93.721435	0.558458	-3.465429	83.765653	6.300316	-101.087220
-12.265479	-114.420044	-44.119087	27.977340	51.407951	-101.456542	-57.905770	77.954682	87.056117	-34.667963	3.439475	88.494250	118.559955	2.008219	98.679248	-137.824025	90.182054	-132.953088	75.447850	66.188953	-18.023462	70.242446	16.303717	70.305336	86.687160	67.751967	106.415702	-1.451094	29.920684	121.906653	-107.395208	-69.577880	-47.806998	92.068603	-107.637785	148.061162	-42.441821	-116.782929	-91.214383	23.630048	28.814671	39.817609	-52.323937	73.113162	100.370925	1.327413	-3.425264	88.035697	8.926067	-93.315886
-7.913566	-118.922601	-57.823847	19.607462	51.965729	-103.226214	-52.667749	87.159672	86.611866	-29.363990	12.755868	84.820038	121.370293	1.198205	98.382937	-152.036947	94.224730	-146.718609	74.308470	72.491617	-25.496470	75.143103	21.541930	75.328835	88.869593	73.222643	108.418198	2.504730	36.757805	117.060600	-97.011583	-73.494257	-49.790495	95.276516	-119.393326	153.347541	-49.650297	-111.883522	-99.637768	22.509662	30.232094	49.007981	-57.533102	72.284063	104.740481	5.264531	-3.739312	90.653764	20.155792	-77.962183
-3.951808	-126.940155	-65.442967	26.506566	50.353388	-100.283029	-50.027224	92.271927	90.832617	-23.151727	13.499520	75.262178	126.928584	4.082975	98.043565	-161.346511	96.966373	-158.041885	74.958137	78.597875	-30.266517	78.484038	26.891540	77.900198	88.502780	77.146648	107.060593	8.458083	48.248421	120.424112	-88.409628	-73.436825	-54.195742	97.590574	-130.934082	158.149934	-56.591375	-100.051490	-112.146325	25.131211	27.825753	57.981110	-63.593998	71.569423	107.029354	11.509035	-3.847506	99.303169	26.663242	-65.133958
0.383263	-133.933393	-62.923286	31.221470	45.147838	-95.336922	-53.859400	98.396957	96.331579	-18.879268	18.173352	74.658989	133.135052	14.921114	99.181937	-172.230605	98.492363	-165.442302	74.823065	83.182024	-34.982076	82.645218	30.331583	79.162016	89.120780	82.303432	109.950851	10.555881	51.298058	134.121321	-82.341817	-78.795939	-61.767400	102.968786	-142.482104	158.301665	-56.026229	-79.694764	-109.112674	32.766990	23.752251	68.033293	-72.462002	73.632371	108.628219	16.264966	-5.283533	106.418452	33.259151	-51.993082
2.378375	-143.927273	-68.043533	36.605645	38.808304	-95.143876	-62.462952	104.834294	101.283851	-18.326873	22.105323	67.866345	136.748944	19.966677	102.762710	-180.362087	100.767543	-171.727320	74.534703	88.554818	-43.720326	82.945291	34.835981	82.560861	87.585812	88.793402	114.016011	10.932235	54.203982	149.137839	-79.856046	-87.178309	-60.995714	103.304763	-147.661706	157.363382	-60.601171	-39.204747	-106.251261	42.375242	15.634908	74.028675	-73.878617	79.411254	106.952138	21.161920	-11.842632	113.722475	40.603757	-42.563231
4.641306	-154.287458	-71.615254	35.243054	34.151296	-90.959846	-73.086518	105.923823	102.367965	-21.696922	32.283476	66.400569	143.083700	20.711969	111.458303	-185.447722	97.183041	-175.272351	77.107726	94.048295	-51.396162	80.500724	36.903374	81.254128	87.604443	94.665239	118.551095	16.157492	53.626451	159.693123	-74.840967	-92.894330	-68.884237	103.565985	-152.173057	164.521725	-62.654921	-42.830417	-101.594333	55.541057	4.579721	74.762660	-72.664516	85.033114	104.433803	26.325127	-17.956862	120.519500	37.888865	-31.017611
-1.493897	-163.061802	-67.534436	33.641024	34.099909	-79.141247	-79.486413	101.035350	102.175748	-24.001545	38.222736	63.081705	146.048624	14.738779	111.146569	-187.246565	93.769596	-178.654212	78.467459	101.810969	-59.732414	83.326195	43.632444	86.455002	87.233454	100.486365	122.376601	19.788617	51.433721	173.530783	-70.658142	-102.335477	-70.879420	105.707022	-157.213028	176.664129	-62.407598	-45.037005	-106.142985	59.367278	-4.555428	73.187550	-74.628922	90.416380	106.411236	30.502894	-22.870192	126.072245	37.756296	-20.876105
-8.484106	-168.989092	-63.493914	34.490518	35.412327	-71.087044	-82.762566	101.066286	101.973888	-24.927796	40.304692	64.729138	147.816755	11.964147	111.137115	-187.210733	90.024474	-181.159591	76.055630	109.743335	-67.051769	84.739405	48.267338	83.513224	86.988175	105.821610	125.988033	20.301737	45.133322	181.636819	-71.242893	-108.741600	-74.679825	103.390181	-166.392139	185.858757	-62.367423	-44.663989	-106.532908	72.452533	-10.238866	73.967929	-78.807403	95.108968	104.154711	36.039455	-24.369704	134.435818	29.908495	-19.221758
-11.236518	-179.170136	-55.832375	49.924613	36.236238	-61.637037	-87.131991	111.907863	104.971492	-26.981291	44.989312	64.805183	149.101711	9.586446	112.183108	-189.515513	84.041648	-181.295991	77.192325	107.035878	-75.750045	83.917568	52.882471	79.100816	86.731881	110.968549	127.605089	22.516775	34.265426	185.094136	-74.744726	-98.905090	-75.925902	104.996987	-176.096087	189.156062	-62.428134	-42.603886	-103.197530	83.570646	-18.323182	70.318946	-84.456890	95.117335	100.681246	39.734844	-23.294910	143.351067	30.112756	-3.891620
-13.005104	-189.879445	-49.889142	61.937235	33.872017	-56.874730	-84.544976	121.282250	107.090208	-27.329278	44.353386	69.674828	151.114827	7.044732	108.019289	-190.683867	78.305275	-178.693093	79.264168	112.187632	-84.447007	84.884915	58.416430	77.965814	85.659251	115.908104	129.777580	24.135880	28.197284	194.475699	-75.409665	-94.441401	-73.881834	110.324105	-186.916030	196.866688	-62.086162	-37.125168	-107.523330	96.569644	-27.630696	68.640273	-91.804844	101.122860	92.286035	41.559234	-24.786271	152.152377	33.739421	6.405788
-17.780758	-196.948548	-34.949799	66.881507	24.651765	-51.332821	-86.063581	129.144070	107.691900	-31.456565	46.832806	73.902617	150.654277	5.848641	105.688467	-197.184964	72.421257	-177.082773	76.556130	118.738164	-92.244768	87.439683	61.169068	76.045568	85.602368	120.244069	130.700255	23.508960	24.806459	200.973335	-77.470248	-86.056594	-76.071494	112.932489	-198.768449	200.307800	-61.601756	-34.971012	-109.039297	101.409028	-28.819934	74.848684	-99.674611	103.040705	85.217216	40.664259	-29.546254	159.982632	38.160266	16.928048
-16.591008	-200.475715	-19.310272	64.144009	14.489055	-51.918772	-90.898671	130.983673	107.453679	-36.282826	46.767786	80.677361	147.878905	5.992414	103.020723	-209.088028	65.232217	-176.348242	77.199955	121.755724	-97.997164	92.255175	65.714466	80.278749	84.602590	125.471470	131.729252	25.846725	26.607092	211.728864	-80.392534	-80.924781	-76.356572	125.513361	-211.248340	197.297569	-61.106348	-32.903383	-96.751182	104.131402	-24.537907	84.620288	-104.243089	103.773927	76.892664	43.110289	-33.951058	165.917808	38.234944	29.020631
-8.345350	-206.299225	-4.006222	64.741013	7.742243	-57.512450	-89.354882	124.031894	107.542598	-41.738514	44.046980	87.048636	148.782339	4.040963	98.554516	-220.870727	56.524624	-173.838090	75.746005	126.744449	-105.171067	93.233239	68.896040	78.350676	82.415982	131.358489	134.289937	24.773017	26.708056	224.500056	-80.121045	-80.553314	-77.164492	132.404769	-223.957581	198.814525	-60.545739	-31.621638	-85.765520	108.228195	-26.979672	97.806390	-106.341956	114.210391	72.557271	43.419357	-41.674122	170.133967	38.931589	40.566701
3.093832	-210.405179	5.939755	52.844901	2.506714	-63.249063	-98.302238	120.125735	109.400176	-44.329215	43.759976	93.968741	142.943196	1.486279	101.403638	-239.864680	47.603848	-173.355935	76.062582	131.874125	-110.447185	95.133488	75.739974	84.133708	84.023458	135.872476	142.596567	23.816915	36.181878	239.505654	-77.980435	-75.848752	-76.783796	132.909400	-234.426996	204.771012	-60.373092	-29.226590	-74.503250	113.447568	-26.133331	109.851126	-110.483208	121.555684	65.817017	45.429603	-51.657735	170.127027	45.365951	49.058827
6.544223	-200.853173	-0.051680	47.286254	0.662627	-65.136736	-107.066886	125.285357	115.637226	-47.818612	43.347557	100.352389	129.884757	-1.696511	94.028587	-245.218443	41.601580	-169.821793	75.953017	137.221707	-114.158817	97.578638	80.215354	87.480465	84.414124	140.836458	154.936473	23.546904	52.995109	251.327949	-74.106291	-66.877906	-78.008070	127.336945	-245.075912	209.579373	-62.835361	-28.259928	-68.385212	116.201609	-27.010110	122.989454	-112.148840	124.474227	59.439937	42.642696	-61.612948	173.715145	54.999921	57.725119
[truncated: 50 more columns]
