# Supplementary material for: Distinctive behaviour of live biopsy-derived carcinoma cells unveiled using coherence-controlled holographic microscopy
Source: PLoS One. 2017 Aug 28;12(8):e0183399. doi: 10.1371/journal.pone.0183399 (PMC5573213; doi:10.1371/journal.pone.0183399)
Supplement: S4 Table — (XLSX) [file pone.0183399.s004.xlsx]

## Sheet: List1
FaDu (h)	SACR2 (h)		FaDu	(h)		SACR2	(h)
19.8688	18.4955		Mean	20.0433		Mean	15.1023
20.3293	13.8408		Box Percentile			Box Percentile
27.4685	14.1158		0.95	30.0775		0.95	22.918
17.325	13.8219		0.75	23.5906		0.75	17.2401
19.395	16.975		0.5	20.1618		0.5	14.8193
22.9657	11.1967		0.25	15.7709		0.25	12.0088
21.9798	13.9617		0.05	10.0454		0.05	8.2293
19.0839	13.356
26.1753	15.0871
18.1826	15.0085
27.3707	14.9793
27.844	14.8193
30.0775	21.7647
15.7709	7.8858
32.9417	21.6386
32.1861	15.8152
14.449	8.2293
17.8924	15.5095
19.8503	12.8093
20.5573	10.0318
22.4224	13.6154
21.6822	17.2401
20.9615	17.0022
11.7748	6.2734
23.9234	9.0431
21.2399	14.2616
26.2812	16.0128
23.3418	12.859
28.5545	18.3046
23.5906	11.8864
15.4644	12.0088
12.4677	13.4504
11.3834	11.2228
9.269	16.1157
10.0454	16.2634
10.0454	9.2525
20.2993	25.0026
20.1618	19.3796
14.0478	21.0741
13.5737	20.9079
27.3637	11.7578
11.4044	10.4824
17.1875	22.918
15.8096	20.9342
17.9376	22.9924
